# Supplementary material for: Active role of lignin in anchoring wood-based stabilizers to the emulsion interface
Source: Royal Society of Chemistry journal article supplement (doi:10.1039/d1gc02891j), 2021-01-01
Supplement: d1gc02891j1.pdf [file d1gc02891j1.pdf]

## SUPPLEMENTARY INFORMATION

### Active role of lignin in anchoring wood-based stabilizers to the emulsion interface

Danila M. de Carvalho, Maarit H. Lahtinen, Mamata Bhattarai, Martin Lawoko and Kirsi S. Mikkonen

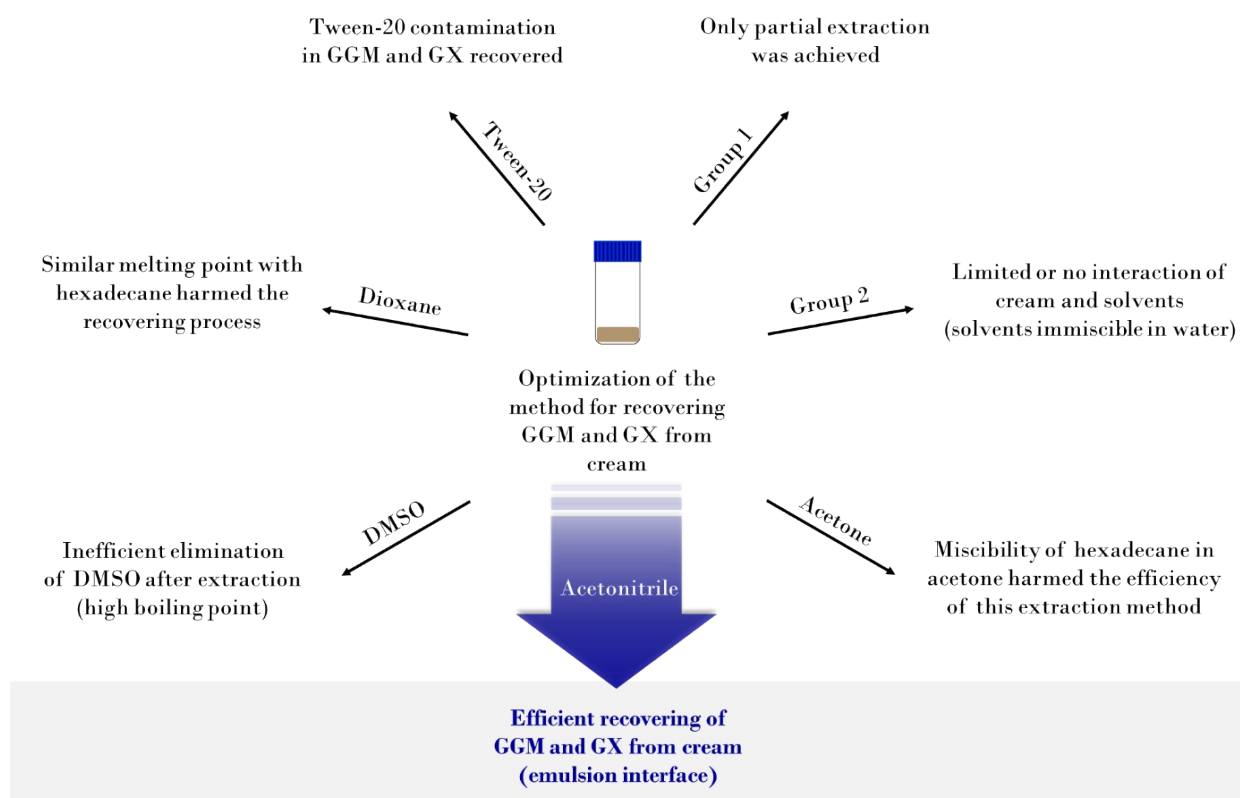

Group 1: methanol, ethanol, propanol, and water.

Group 2: chloroform, heptane, hexane, isooctane, and toluene.

**Figure S1** Summary of the attributes that qualified the acetonitrile as the most suitable solvent for wood-based stabilizers (*i.e.*, GGM and GX) recovering from cream.

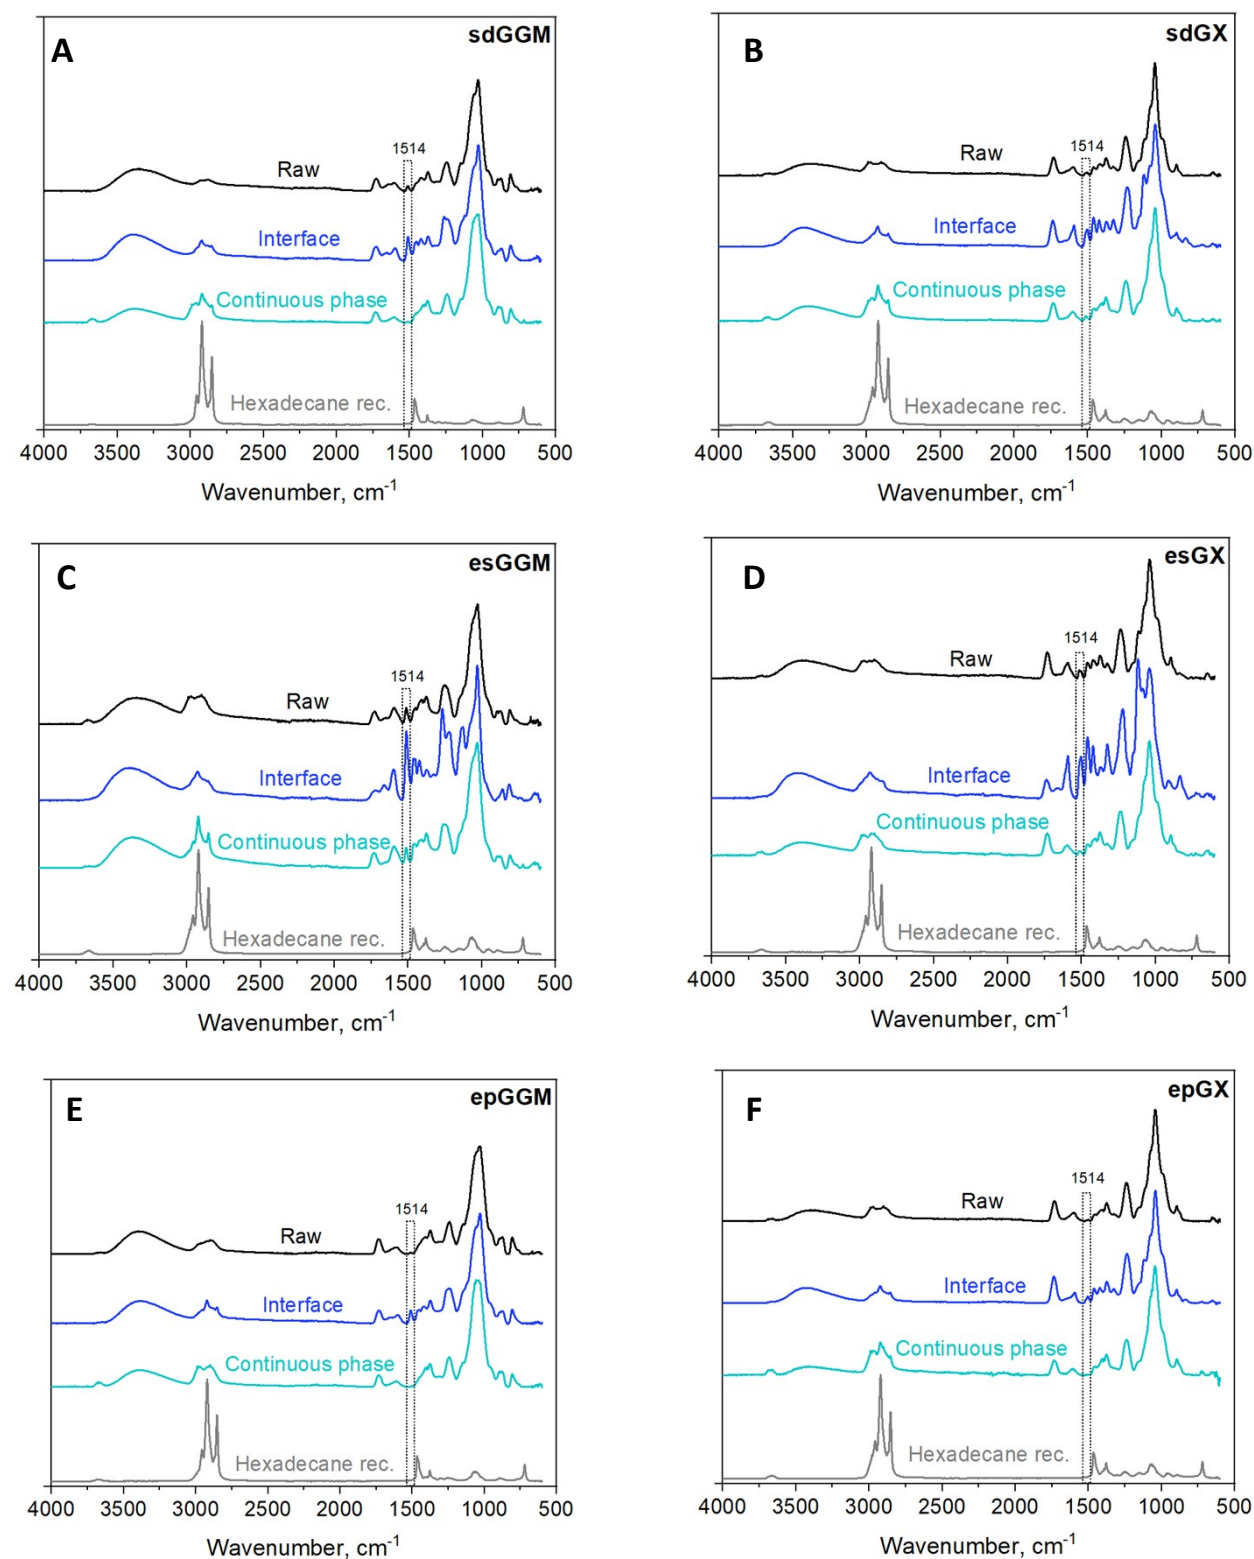

**Figure S2** FTIR spectra of raw GGM and GX samples, fractions recovered from interface and continuous phase of emulsion prepared using sdGGM (A), sdGX (B), esGGM (C), esGX (D), epGGM (E), and epGX (F) as stabilizers, and hexadecane recovered from emulsions. Assignment for the relevant bands observed in FTIR spectra are presented in Table S1.

**Table S1** Assignment for the relevant bands observed in FTIR spectra.

| Absorption band (cm <sup>-1</sup> ) | Band assignments <sup>a</sup>                                |
|-------------------------------------|--------------------------------------------------------------|
| 3750-3000                           | O-H stretching vibration of hydrogen-bonded                  |
| 2907                                | Aliphatic C-H stretching                                     |
| 1734                                | C=O stretching vibration carbonyl groups                     |
| 1706                                | Free acetic acid (absent in the spectra)                     |
| 1665                                | C=O stretching in conjugation to the aromatic ring           |
| 1602                                | Water absorption                                             |
| 1514                                | Aromatic skeletal vibration of lignin rings                  |
| 1426                                | Asymmetric aliphatic C-H deformation of methoxyl             |
| 1377                                | Symmetric aliphatic C-H bending of methoxyl in acetyl groups |
| 1241                                | C-O stretching                                               |
| 1042                                | C-O and C-C stretching or C-OH bending                       |
| 896                                 | β-glycosidic linkage between sugar units                     |

<sup>a</sup>Band assignments were assessed according to the literature.<sup>1-8</sup> Dashed box indicates the assignment of the band identified in Figure S2.

**Table S2** Assignment for the lignin units and relevant lignin substructures, lignin side and end groups, and lignin-carbohydrates bonds cross-signals in sdGGM, esGGM, epGGM, sdGX, esGX, and epGX samples recovered from interface and continuous phase of emulsions. The cross-signals used in this study for qualitative identification are highlighted in bold and variation in the signals among samples are in the range of  $\pm 0.1$  ppm and  $\pm 1.0$  ppm for  $^1\text{H}$  and  $^{13}\text{C}$  dimensions, respectively.

| Structural units <sup>a</sup>          | $\delta_{\text{C}}$ (ppm) | $\delta_{\text{H}}$ (ppm) | Assignments                                                                       | Identified in <sup>b</sup>                   |
|----------------------------------------|---------------------------|---------------------------|-----------------------------------------------------------------------------------|----------------------------------------------|
| Syringyl ( $\text{S}_{2,6}$ )          | <b>103.9</b>              | <b>6.68</b>               | $\text{C}_2/\text{H}_2$ and $\text{C}_6/\text{H}_6$ in S-units                    | <b>1, 3, 7, 8, 9, 10, 11, 12</b>             |
| Guaiacyl ( $\text{G}_2$ )              | <b>110.9</b>              | <b>6.94</b>               | $\text{C}_2/\text{H}_2$ in G-units                                                | 1, 2, 3, 4, 5, 7, 8, 9, 10, 11               |
| Guaiacyl ( $\text{G}_5$ )              | 115.0                     | 6.83                      | $\text{C}_5/\text{H}_5$ in G-units                                                | <b>1, 2, 3, 4, 5, 6, 7, 8, 9, 10, 11</b>     |
| Guaiacyl ( $\text{G}_6$ )              | 118.7                     | 6.76                      | $\text{C}_6/\text{H}_6$ in G-units                                                | 1, 2, 3, 4, 5, 7, 8, 9, 10, 11               |
| p-hydroxyphenyl ( $\text{H}_{2,6}$ )   | <b>127.5</b>              | <b>7.21</b>               | $\text{C}_2/\text{H}_2$ and $\text{C}_6/\text{H}_6$ in H-units                    | <b>1, 3, 4</b>                               |
| $\beta$ -aryl ether ( $\beta$ -O-4)    | <b>71.4</b>               | <b>4.71</b>               | $\beta$ -O-4 signal in $\alpha$                                                   | <b>1, 2, 3, 4, 5, 7, 8, 9, 10, 11, 12</b>    |
| $\beta$ -aryl ether ( $\beta$ -O-4)    | 85.5                      | 4.16                      | $\beta$ -O-4 signal in $\beta$ in S units                                         | 1, 3, 7, 8, 9, 10, 11                        |
| $\beta$ -aryl ether ( $\beta$ -O-4)    | 83.4                      | 4.28                      | $\beta$ -O-4 signal in $\beta$ in G units                                         | 1, 2, 3, 4, 5, 7, 8, 9, 10, 11               |
| $\beta$ -aryl ether ( $\beta$ -O-4)    | 59.5                      | 3.70/3.44                 | $\beta$ -O-4 signal in $\gamma$                                                   | 1, 2, 3, 4, 5, 6, 7, 8, 9, 10, 11, 12        |
| Phenylcoumaran ( $\beta$ -5)           | <b>87.2</b>               | <b>5.43</b>               | $\beta$ -5 signal in $\alpha$                                                     | <b>1, 2, 3, 4, 5, 7, 9, 10</b>               |
| Phenylcoumaran ( $\beta$ -5)           | 52.8                      | 3.46                      | $\beta$ -5 signal in $\beta$                                                      | 1, 3, 4, 5, 7, 8, 9, 10, 11                  |
| Phenylcoumaran ( $\beta$ -5)           | 62.4                      | 3.72                      | $\beta$ -5 signal in $\gamma$                                                     | 1, 2, 3, 4, 5, 7, 8, 9, 10, 11, 12           |
| Dibenzodioxocin (5-5/ $\beta$ -O-4)    | 82.9                      | 4.81                      | 5-5/ $\beta$ -O-4 signal in $\alpha$                                              | 1, 3, 9, 10                                  |
| Dibenzodioxocin (5-5/ $\beta$ -O-4)    | <b>86.2</b>               | <b>3.91</b>               | 5-5/ $\beta$ -O-4 signal in $\beta$                                               | <b>1, 3, 9</b>                               |
| Resinol ( $\beta$ - $\beta$ )          | <b>85.1</b>               | <b>4.61</b>               | $\beta$ - $\beta$ signal in $\alpha$                                              | <b>1, 3, 4, 5, 7, 8, 9, 10, 11</b>           |
| Resinol ( $\beta$ - $\beta$ )          | 53.6                      | 3.04                      | $\beta$ - $\beta$ signal in $\beta$                                               | 1, 3, 4, 5, 7, 8, 9, 10, 11                  |
| Resinol ( $\beta$ - $\beta$ )          | 71.2                      | 4.14/3.83                 | $\beta$ - $\beta$ signal in $\gamma$                                              | 1, 2, 3, 4, 5, 6, 7, 8, 9, 10, 11            |
| SECO $_{\alpha}$ ( $\beta$ - $\beta$ ) | 33.6                      | 2.53/2.48                 | Secoisolariciresinol in $\alpha$                                                  | 1, 2, 3, 4, 5, 6, 7, 8, 9                    |
| SECO $_{\beta}$ ( $\beta$ - $\beta$ )  | <b>42.3</b>               | <b>1.84</b>               | Secoisolariciresinol in $\beta$                                                   | <b>1, 3, 4, 5</b>                            |
| Spirodienone ( $\beta$ -1)             | <b>81.2</b>               | <b>5.00</b>               | $\beta$ -1 signal in $\alpha$                                                     | <b>1, 9</b>                                  |
| Spirodienone ( $\beta$ -1)             | 59.8                      | 2.75                      | $\beta$ -1 signal in $\beta$                                                      | 1                                            |
| Spirodienone ( $\beta$ -1)             | 79.4                      | 4.11                      | $\beta$ -1 signal in $\beta'$                                                     | -                                            |
| Methoxy group                          | <b>55.4</b>               | <b>3.73</b>               | C/H in -OMe in G- and S-units                                                     | <b>1, 2, 3, 4, 5, 6, 7, 8, 9, 10, 11, 12</b> |
| Cinnamyl alcohol                       | 128.7                     | 6.42                      | Cinnamyl alcohol signal in $\alpha$                                               | 1, 2, 3, 4, 5, 10                            |
| Cinnamyl alcohol                       | 127.5                     | 6.21                      | Cinnamyl alcohol signal in $\beta$                                                | 1, 2, 3, 4, 5, 10                            |
| Cinnamyl alcohol                       | <b>62.8</b>               | <b>3.90</b>               | Cinnamyl alcohol signal in $\gamma$                                               | <b>1, 2, 3, 4, 5, 6, 7, 8, 9, 10, 11, 12</b> |
| OSC ( $\text{G}_2$ )                   | <b>112.0</b>              | <b>7.31</b>               | $\text{C}_2/\text{H}_2$ in ( $\text{C}=\text{O}$ ) $_{\alpha}$ in G-units         | <b>1, 3, 4, 5, 9</b>                         |
| OSC ( $\text{G}_6$ )                   | 123.0                     | 7.64/7.56                 | $\text{C}_6/\text{H}_6$ in ( $\text{C}=\text{O}$ ) $_{\alpha}$ in G-units         | 1, 3, 9                                      |
| OSC ( $\text{S}_{2,6}$ )               | <b>106.4</b>              | <b>7.20/7.06</b>          | $\text{C}_{2,6}/\text{H}_{2,6}$ in ( $\text{C}=\text{O}$ ) $_{\alpha}$ in S-units | <b>7, 9, 10</b>                              |
| OSC $_{\alpha}$                        | 154.0                     | 7.61                      | Cinnamyl aldehyde in $\alpha$                                                     | 1, 3, 4, 5, 7, 9                             |
| OSC $_{\beta}$                         | 126.1                     | 6.77                      | Cinnamyl aldehyde in $\beta$                                                      | 1, 3, 4, 5, 9                                |
| DCA $_{\alpha}$                        | 31.4                      | 2.52                      | Dehydroconiferyl alcohol in $\alpha$                                              | 1, 2, 3, 4, 5, 7, 9                          |
| DCA $_{\beta}$                         | <b>34.4</b>               | <b>1.67</b>               | Dehydroconiferyl alcohol in $\beta$                                               | <b>1, 2, 3, 4, 5, 7, 9</b>                   |
| DCA $_{\gamma}$                        | 60.0                      | 3.42                      | Dehydroconiferyl alcohol in $\gamma$                                              | 1, 2, 3, 4, 5, 6, 7, 8, 9, 10, 11, 12        |
| PG                                     | <b>102.8/99.8</b>         | <b>5.18/4.75</b>          | Phenylglycoside units                                                             | <b>1, 2, 4, 6, 7, 8, 10</b>                  |
| BE ( $\text{BE}_1$ )                   | <b>80.2</b>               | <b>4.50</b>               | Benzylether in C-3 and C-2                                                        | <b>1, 3</b>                                  |
| BE ( $\text{BE}_2$ )                   | <b>82.3</b>               | <b>5.20</b>               | Benzylether in C-6 and C-5                                                        | <b>7, 9</b>                                  |
| BEst                                   | <b>74.3</b>               | <b>5.96</b>               | Benzyl ester ( $\alpha$ -ester)                                                   | -                                            |
| GE                                     | <b>64.0/62.0</b>          | <b>4.50/4.00</b>          | $\gamma$ -ester units                                                             | <b>1, 2, 3, 4, 5, 6, 7, 8, 9, 10, 11, 12</b> |

<sup>a</sup>Secoisolariciresinol (SECO  $\beta$ - $\beta$ ); Oxidized side chain (OSC); Dehydroconiferyl alcohol (DCA); PG: phenylglycoside; BE: benzylether, in which  $\text{BE}_1$  refers to linkage at C-6 in glucose, mannose, and galactose or C-5 in arabinose and  $\text{BE}_2$  refers to linkage at C-2 or C-3 in glucose, mannose, galactose, xylose, and arabinose; BEst: benzyl ester; and GE:  $\gamma$ -ester. Contours assignments were assessed according to the literature.<sup>9-15</sup>

<sup>b</sup>The numbers refer to the following samples: 1: sdGGM interface; 2: sdGGM continuous phase; 3: esGGM interface; 4: esGGM continuous phase; 5: epGGM interface; 6: epGGM continuous phase; 7: sdGX interface; 8: sdGX continuous phase; 9: esGX interface; 10: esGX continuous phase; 11: epGX interface; and 12: epGX continuous phase.

**Table S3** Assignment for the relevant carbon-hydrogen correlation signals of polysaccharides linkages in sdGGM, esGGM, epGGM, sdGX, esGX, and epGX samples recovered from interface and continuous phase of emulsions. The cross-signals used in this study for qualitative identification are highlighted in bold and variation in the signals among samples are in the range of  $\pm 0.1$  ppm and  $\pm 1.0$  ppm for  $^1\text{H}$  and  $^{13}\text{C}$  dimensions, respectively.

| Structural units                      | $\delta_{\text{C}}$ (ppm) | $\delta_{\text{H}}$ (ppm) | Assignments <sup>a</sup>                                                               | Identified in <sup>b</sup>                   |
|---------------------------------------|---------------------------|---------------------------|----------------------------------------------------------------------------------------|----------------------------------------------|
| Acetyl                                | <b>20.9</b>               | <b>2.01</b>               | -CH <sub>3</sub> in acetyl                                                             | <b>1, 2, 3, 4, 5, 6, 7, 8, 9, 10, 11, 12</b> |
| Ara <sub>1</sub>                      | 107.8                     | 4.76                      | C <sub>1</sub> /H <sub>1</sub> in $\beta$ -L-arabinopyranoside                         | 1, 2, 3, 4, 5, 6, 8, 10                      |
| Ara <sub>2</sub>                      | 83.2                      | 3.75                      | C <sub>2</sub> /H <sub>2</sub> in $\beta$ -L-arabinopyranoside                         | 1, 2, 4, 6, 8, 9, 10                         |
| Ara <sub>4</sub>                      | 85.1                      | 4.00                      | C <sub>4</sub> /H <sub>4</sub> in $\beta$ -L-arabinopyranoside                         | 1, 2, 3, 4, 6, 9                             |
| Ara <sub>5</sub>                      | 62.3                      | 3.42/3.36                 | C <sub>5</sub> /H <sub>5</sub> in $\beta$ -L-arabinopyranoside                         | 1, 2, 3, 4, 5, 7, 8, 9, 10, 11, 12           |
| Glc <sub>1</sub>                      | <b>102.0</b>              | <b>4.32</b>               | C <sub>1</sub> /H <sub>1</sub> in $\beta$ -D-glucopyranoside                           | <b>1, 2, 3, 4, 5, 6, 7, 8, 9, 10, 11, 12</b> |
| Glc <sub>2</sub>                      | 74.8                      | 2.90                      | C <sub>2</sub> /H <sub>2</sub> in $\beta$ -D-glucopyranoside                           | 1, 2, 4, 5, 6, 7, 8, 9, 10, 11, 12           |
| Glc <sub>3</sub>                      | 76.7                      | 3.05                      | C <sub>3</sub> /H <sub>3</sub> in $\beta$ -D-glucopyranoside                           | 1, 2, 3, 4, 5, 6, 7, 8, 9, 10, 11, 12        |
| Glc <sub>4</sub>                      | 79.9                      | 3.38                      | C <sub>4</sub> /H <sub>4</sub> in $\beta$ -D-glucopyranoside                           | 1, 2, 4, 5, 6, 7, 8, 10, 11, 12              |
| Glc <sub>5</sub>                      | 70.2                      | 3.18                      | C <sub>5</sub> /H <sub>5</sub> in $\beta$ -D-glucopyranoside                           | 2, 4, 5, 6, 7, 8, 9, 10, 11, 12              |
| Glc <sub>6</sub> /Man <sub>6</sub>    | 60.0                      | 3.59                      | C <sub>6</sub> /H <sub>6</sub> in $\beta$ -D-gluco-/mannopyranoside                    | 1, 2, 3, 4, 5, 6, 7, 8, 9, 10, 11, 12        |
| Xyl <sub>1</sub>                      | <b>101.5</b>              | <b>4.38</b>               | C <sub>1</sub> /H <sub>1</sub> in $\beta$ -D-xylopyranoside                            | <b>1, 2, 4, 5, 6, 7, 8, 9, 10, 11, 12</b>    |
| Xyl <sub>2</sub>                      | 72.7                      | 3.03                      | C <sub>2</sub> /H <sub>2</sub> in $\beta$ -D-xylopyranoside                            | 1, 2, 3, 4, 5, 6, 7, 8, 9, 10, 11, 12        |
| Xyl <sub>2</sub> (r <sub>a</sub> )    | 69.7                      | 3.27                      | C <sub>2</sub> /H <sub>2</sub> in $\beta$ -D-xylopyranoside of xylans reduction end    | 1, 2, 4, 5, 6, 7, 8, 9, 10, 11, 12           |
| Xyl <sub>2</sub> -Ac                  | <b>73.0</b>               | <b>4.40</b>               | C <sub>2</sub> /H <sub>2</sub> in 2-O-acetyl- $\beta$ -D-xylopyranoside                | <b>1, 3, 4, 5, 7, 8, 9, 10, 11, 12</b>       |
| Xyl <sub>1</sub> ( <sub>2</sub> Ac)   | 100.8                     | 4.49                      | C <sub>1</sub> /H <sub>1</sub> in 2-O-acetyl- $\beta$ -D-xylopyranoside                | 1, 2, 3, 4, 5, 6, 7, 8                       |
| Xyl <sub>3</sub>                      | 74.5                      | 3.28                      | C <sub>3</sub> /H <sub>3</sub> in $\beta$ -D-xylopyranoside                            | 1, 2, 3, 4, 5, 6, 7, 8, 9, 10, 11, 12        |
| Xyl <sub>3</sub> -Ac                  | <b>74.5</b>               | <b>4.81</b>               | C <sub>3</sub> /H <sub>3</sub> in 3-O-acetyl- $\beta$ -D-xylopyranoside                | <b>1, 2, 3, 4, 5, 6, 7, 8, 9, 10, 11, 12</b> |
| Xyl <sub>2,3</sub> -Ac                | <b>71.6</b>               | <b>4.51</b>               | C <sub>2</sub> /H <sub>2</sub> in 2,3-O-acetyl- $\beta$ -D-xylopyranoside              | <b>1, 2, 3, 4, 5, 6, 7, 8, 9, 10, 11, 12</b> |
| Xyl <sub>2,3</sub> -Ac                | 72.9                      | 4.90                      | C <sub>3</sub> /H <sub>3</sub> in 2,3-O-acetyl- $\beta$ -D-xylopyranoside              | <b>1, 2, 3, 4, 5, 6, 7, 8, 9, 10, 11, 12</b> |
| Xyl <sub>1</sub> ( <sub>2,3</sub> Ac) | 99.3                      | 4.68                      | C <sub>1</sub> /H <sub>1</sub> in 2,3-O-acetyl- $\beta$ -D-xylopyranoside              | 1, 2, 4, 5, 6, 7, 8, 9, 10, 11, 12           |
| Xyl <sub>4</sub>                      | 75.7                      | 3.51                      | C <sub>4</sub> /H <sub>4</sub> in $\beta$ -D-xylopyranoside                            | 1, 2, 3, 4, 5, 6, 7, 8, 9, 10, 11, 12        |
| Xyl <sub>5</sub>                      | 62.8                      | 3.78/3.17                 | C <sub>5</sub> /H <sub>5</sub> in $\beta$ -D-xylopyranoside                            | 1, 2, 3, 4, 5, 6, 7, 8, 9, 10, 11, 12        |
| Xyl <sub>4</sub> (nr)                 | 66.0                      | 3.31                      | C <sub>4</sub> /H <sub>4</sub> in $\beta$ -D-xylopyranoside of xylans non-reducing end | 1, 2, 4, 5, 6, 8                             |
| Xyl <sub>5</sub> (nr)                 | 65.3                      | 3.62/2.98                 | C <sub>5</sub> /H <sub>5</sub> in $\beta$ -D-xylopyranoside of xylans non-reducing end | 1, 2, 3, 4, 5, 7, 8, 9, 10, 11, 12           |
| Xyl <sub>6</sub> (nr)                 | 103.4                     | 4.15                      | C <sub>1</sub> /H <sub>1</sub> in $\beta$ -D-xylopyranoside of xylans non-reducing end | 1, 2, 4, 5, 6, 7, 8, 9, 10, 11, 12           |
| Xyl <sub>6</sub> (r <sub>a</sub> )    | 92.3                      | 4.85                      | C <sub>1</sub> /H <sub>1</sub> in $\alpha$ -D-xylopyranoside of xylans reduction end   | 1, 2, 4, 5, 6, 7, 8, 9, 10, 11, 12           |
| Xyl <sub>6</sub> (r <sub>b</sub> )    | 97.3                      | 4.21                      | C <sub>1</sub> /H <sub>1</sub> in $\beta$ -D-xylopyranoside of xylans reduction end    | 1, 2, 3, 4, 5, 6, 7, 8, 9, 10, 11, 12        |
| Man <sub>1</sub>                      | <b>100.3</b>              | <b>4.51</b>               | C <sub>1</sub> /H <sub>1</sub> in $\beta$ -D-mannopyranoside                           | <b>1, 2, 3, 4, 5, 6, 7, 8, 11, 12</b>        |
| Man <sub>2</sub>                      | 74.5                      | 2.90                      | C <sub>2</sub> /H <sub>2</sub> in $\beta$ -D-mannopyranoside                           | 1, 2, 3, 4, 5, 6, 7, 8, 9, 10, 11, 12        |
| Man <sub>2</sub> -Ac                  | <b>70.8</b>               | <b>5.25</b>               | C <sub>2</sub> /H <sub>2</sub> in 2-O-acetyl- $\beta$ -D-mannopyranoside               | <b>1, 2, 3, 4, 5, 6, 7, 8, 10, 11, 12</b>    |
| Man <sub>3</sub>                      | 76.6                      | 3.08                      | C <sub>3</sub> /H <sub>3</sub> in $\beta$ -D-mannopyranoside                           | 1, 2, 3, 4, 5, 6, 7, 8, 9, 10, 11, 12        |
| Man <sub>3</sub> -Ac                  | <b>73.0</b>               | <b>4.82</b>               | C <sub>3</sub> /H <sub>3</sub> in 3-O-acetyl- $\beta$ -D-mannopyranoside               | <b>1, 2, 3, 4, 5, 6, 7, 8, 9, 10, 11, 12</b> |
| Man <sub>4</sub>                      | 79.3                      | 3.38                      | C <sub>4</sub> /H <sub>4</sub> in $\beta$ -D-mannopyranoside                           | 1, 2, 4, 5, 6, 7, 8, 10, 11, 12              |
| Man <sub>5</sub>                      | 76.6                      | 3.63                      | C <sub>5</sub> /H <sub>5</sub> in $\beta$ -D-mannopyranoside                           | 1, 2, 3, 4, 5, 6, 7, 8, 9, 10, 11, 12        |
| Man <sub>6</sub> (r <sub>a</sub> )    | 93.5                      | 4.86                      | C <sub>1</sub> /H <sub>1</sub> in $\alpha$ -D-mannopyranoside of mannan reduction end  | 1, 2, 3, 4, 5, 6, 8, 10, 12                  |
| Man <sub>6</sub> (r <sub>b</sub> )    | 93.6                      | 4.59                      | C <sub>1</sub> /H <sub>1</sub> in $\beta$ -D-mannopyranoside of mannan reduction end   | 1, 2, 4, 5, 6, 8                             |
| Gal <sub>1</sub>                      | <b>105.0</b>              | <b>4.26</b>               | C <sub>1</sub> /H <sub>1</sub> in $\beta$ -D-galactopyranoside                         | <b>1, 2, 4, 5, 6, 8, 10, 12</b>              |
| U <sub>1</sub>                        | 97.4                      | 5.10                      | C <sub>1</sub> /H <sub>1</sub> in 4-O-methyl- $\alpha$ -D-glucuronic acid              | 1, 5, 7, 8, 10, 11, 12                       |
| U <sub>4</sub>                        | <b>81.6</b>               | <b>3.08</b>               | C <sub>4</sub> /H <sub>4</sub> in 4-O-methyl- $\beta$ -D-glucuronic acid               | <b>1, 2, 5, 6, 7, 8, 9, 10, 11, 12</b>       |
| U <sub>Gal A</sub>                    | 91.6/94.3                 | 5.19/4.89                 | C <sub>1</sub> /H <sub>1</sub> in galacturonic acid                                    | 1, 2, 4, 5, 6, 8, 10, 12                     |

<sup>a</sup>Contours assignments were assessed according to the literature.<sup>10</sup>

<sup>b</sup>The numbers refer to the following samples: 1: sdGGM interface; 2: sdGGM continuous phase; 3: esGGM interface; 4: esGGM continuous phase; 5: epGGM interface; 6: epGGM continuous phase; 7: sdGX interface; 8: sdGX continuous phase; 9: esGX interface; 10: esGX continuous phase; 11: epGX interface; and 12: epGX continuous phase.

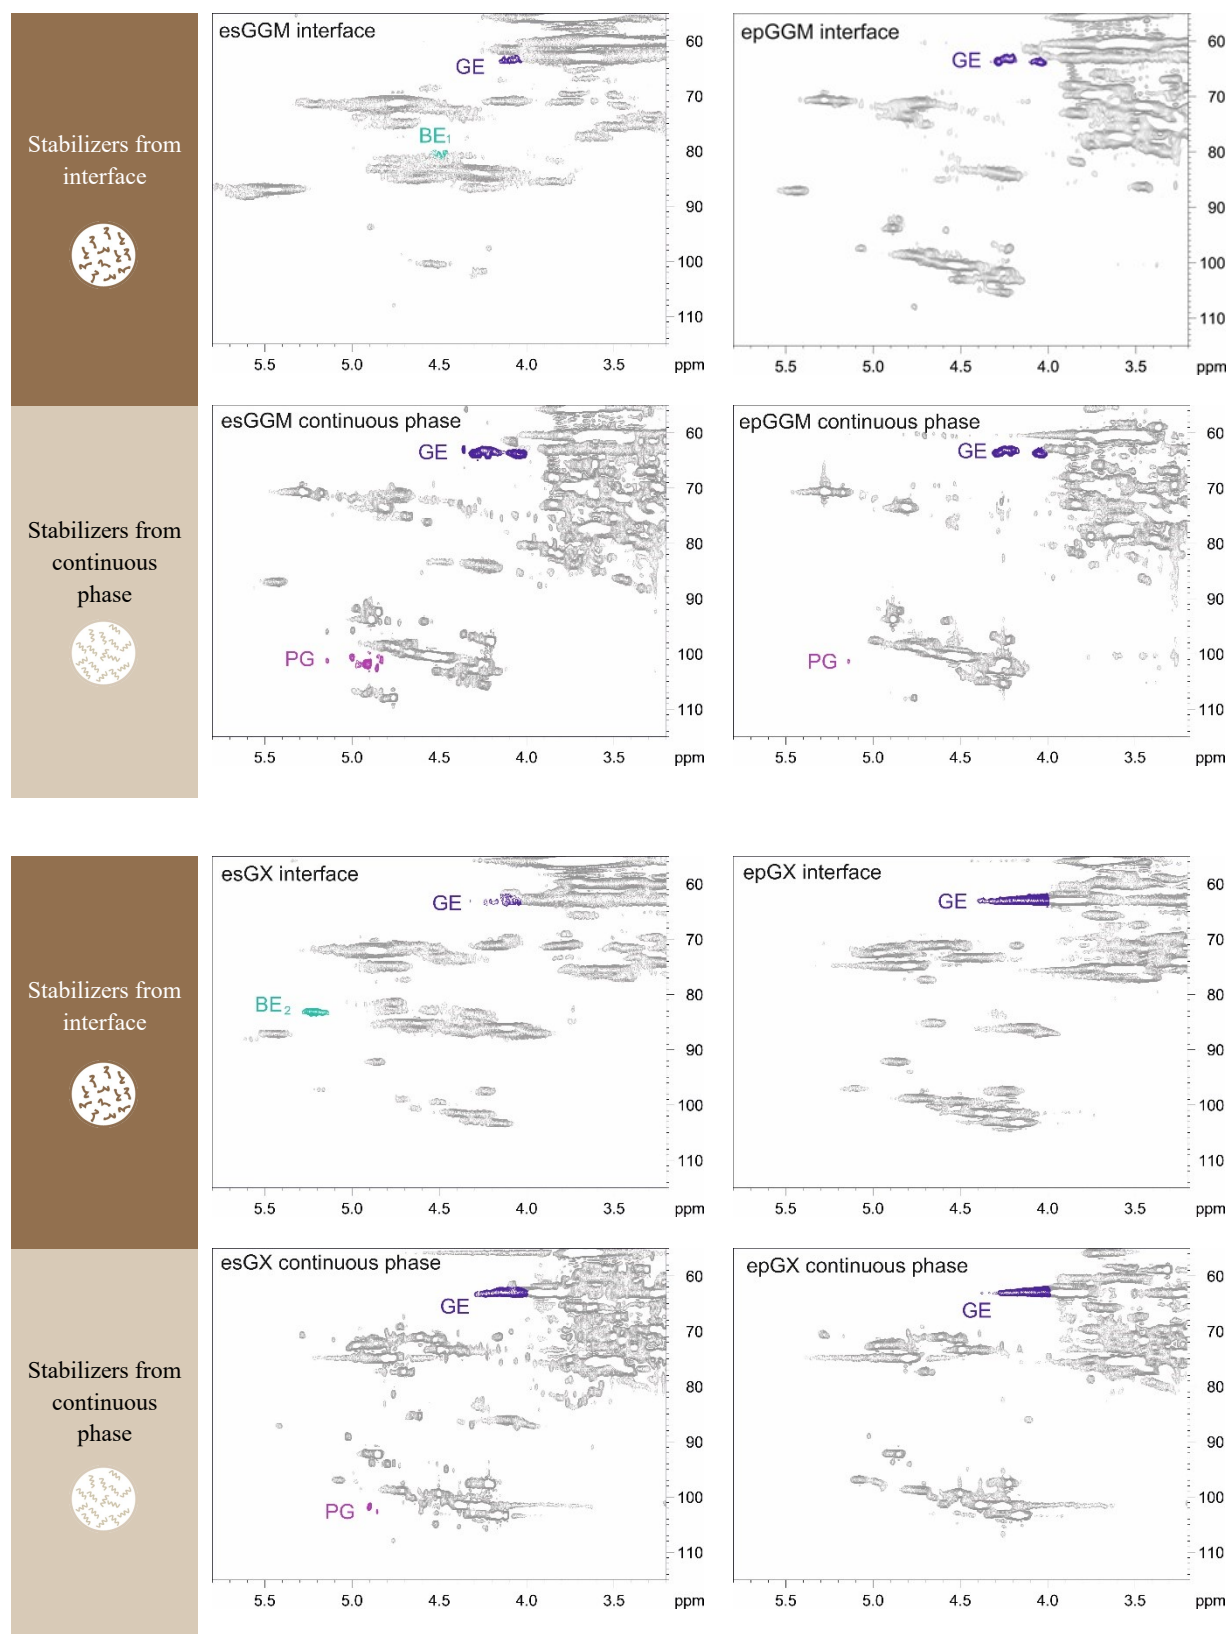

**Figure S3** Distribution profile of lignin-carbohydrate structures from sdGGM, esGGM, epGGM, sdGX, esGX, and epGX distributed between interface and continuous phase of oil-in-water emulsions. Cross-signal for phenylglycoside (PG), benzylether (BE) and gamma-ester (GE) identified in samples are highlighted in the spectra.



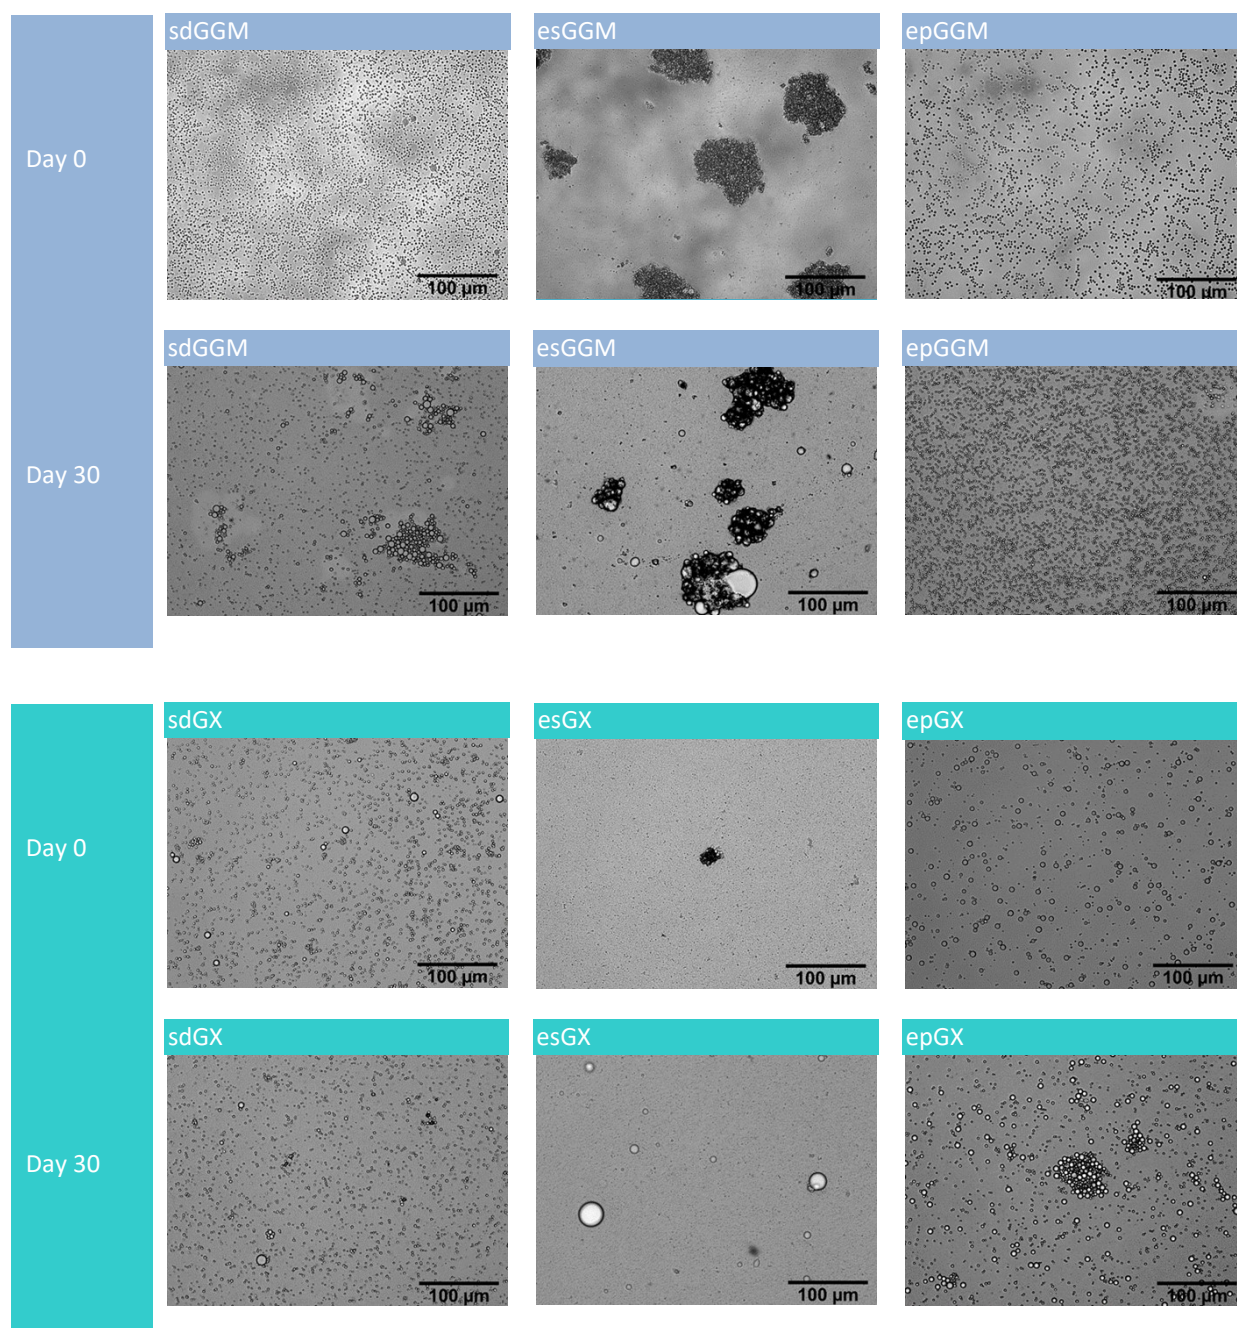

**Figure S4** Droplet morphology of oil-in-water emulsions with 5% (w/w) hexadecane as oil component and stabilized by 1% (w/w) sdGGM, esGGM, epGGM, sdGX, esGX, and epGX assessed just after emulsion preparation (day 0) and after storage for 30 days.

**Table S4** Mass balance and chemical characterization of glucuronoxylan (GX) samples<sup>a</sup>.

| Samples                                                  |                               | sdGX        | esGX        | epGX        |
|----------------------------------------------------------|-------------------------------|-------------|-------------|-------------|
| Mass balance based on original spruce wood (%)           |                               | 20.7        | 6.0         | 13.4        |
| Normalized chemical composition of sugars and lignin (%) | Xyl                           | 68.9 ± 1.0  | 63.8 ± 0.9  | 73.7 ± 0.7  |
|                                                          | GlcA                          | 0.9 ± 0.3   | 0.1 ± 0.0   | 1.5 ± 0.4   |
|                                                          | Man                           | 3.8 ± 0.3   | 1.9 ± 0.2   | 3.6 ± 0.2   |
|                                                          | Glc                           | 2.5 ± 0.2   | 1.0 ± 0.4   | 4.0 ± 0.2   |
|                                                          | Gal                           | 2.2 ± 0.1   | 1.1 ± 0.1   | 3.3 ± 0.1   |
|                                                          | Ara                           | 0.0 ± 0.0   | 0.2 ± 0.1   | 0.0 ± 0.0   |
|                                                          | Rha                           | 1.4 ± 0.1   | 1.5 ± 0.1   | 1.0 ± 0.0   |
|                                                          | Fuc                           | 0.0 ± 0.0   | 0.0 ± 0.0   | 0.0 ± 0.1   |
|                                                          | GalA                          | 0.4 ± 0.1   | 0.0 ± 0.0   | 0.2 ± 0.2   |
| Lignin                                                   |                               | 19.9 ± 1.2  | 30.4 ± 1.3  | 12.7 ± 0.5  |
| GX purity (%) <sup>b</sup>                               |                               | 69.8 ± 0.7  | 63.9 ± 0.9  | 75.2 ± 0.4  |
| Residual GM (%) <sup>b</sup>                             |                               | 6.3 ± 0.5   | 2.8 ± 0.6   | 7.6 ± 0.3   |
| Residual pectin (%) <sup>b</sup>                         |                               | 4.0 ± 0.2   | 2.9 ± 0.3   | 4.5 ± 0.3   |
| Acetyl groups                                            | Content (%) <sup>c</sup>      | 9.1         | 7.4         | 10.0        |
|                                                          | DS <sub>Ac</sub> <sup>d</sup> | 0.46        | 0.40        | 0.48        |
|                                                          | Distribution <sup>e</sup>     | 0.5:1.0:0.2 | 0.7:1.0:0.3 | 0.5:1.0:0.2 |
| Molar mass                                               | Mn (kDa)                      | 1.2 ± 0.0   | 0.6 ± 0.0   | 1.6 ± 0.0   |
|                                                          | Mw (kDa)                      | 4.2 ± 0.6   | 1.2 ± 0.1   | 4.9 ± 0.1   |
|                                                          | DI                            | 3.5 ± 0.4   | 1.9 ± 0.1   | 3.1 ± 0.0   |
| Syringyl/guaiacyl ratio                                  |                               | 6.8:1       | 6.1:1       | 11.6:1      |

<sup>a</sup>In the table: sdGX: spray-dried glucuronoxylan; esGX: ethanol-soluble glucuronoxylan; epGX: ethanol-precipitated glucuronoxylan; Xyl: xylose; GlcA: glucuronic acid; Man: mannose; Glc: glucose; Gal: galactose; Ara: arabinose; Rha: rhamnose; Fuc: fucose; GalA: galacturonic acid, DS<sub>Ac</sub>: degree of acetylation of glucuronoxylan samples; Mn: number-average molar mass; Mw: weight-average molar mass; and DI: dispersity index.

<sup>b</sup>For the estimation of the purity of glucuronoxylan were considered the content of xylose and glucuronic acid in samples. Similarly, glucomannan content was estimated considering mannan and glucose moieties and other sugars identified, *i.e.*, galactose, arabinose, rhamnose, fucose, and galacturonic acid, were considered as residual pectin.

<sup>c</sup>mol acetyl per 100 mol pentose.

<sup>d</sup>DS<sub>Ac</sub> was calculate considering only xylopyranosyl units, which is the sugar present in glucuronoxylan backbone and that can be naturally acetylated.

<sup>e</sup>Acetylation distribution in xylopyranosyl units (C-2:C-3:C-2,3) obtained by semi-quantitative analysis from NMR spectra.

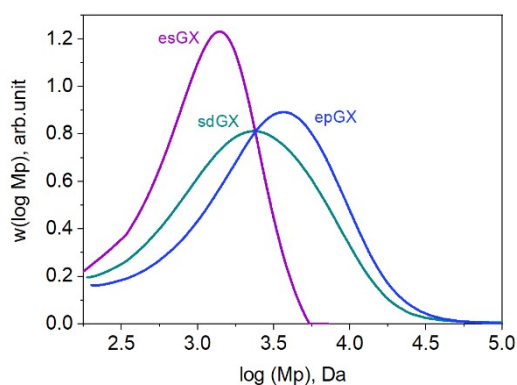**Figure S5** Molar mass distribution of sdGX, esGX, and epGX samples.



**Table S5** Assignment for the relevant lignin substructures, lignin side and end groups and lignin-carbohydrates bonds cross-signals in sdGX, esGX, and epGX samples. The cross-signals used in this study for qualitative identification are highlighted in bold and variation in the signals among samples are in the range of  $\pm 0.1$  ppm and  $\pm 1.0$  ppm for  $^1\text{H}$  and  $^{13}\text{C}$  dimensions, respectively.

| Structural units <sup>a</sup>          | $\delta_{\text{C}}$ (ppm) | $\delta_{\text{H}}$ (ppm) | Assignments                                                                  | Identified in           |
|----------------------------------------|---------------------------|---------------------------|------------------------------------------------------------------------------|-------------------------|
| Syringyl ( $\text{S}_{2,6}$ )          | <b>103.9</b>              | <b>6.68</b>               | $\text{C}_2/\text{H}_2$ and $\text{C}_6/\text{H}_6$ in S-units               | <b>sdGX, esGX, epGX</b> |
| Guaiacyl ( $\text{G}_2$ )              | <b>110.9</b>              | <b>6.94</b>               | $\text{C}_2/\text{H}_2$ in G-units                                           | <b>sdGX, esGX, epGX</b> |
| Guaiacyl ( $\text{G}_5$ )              | 115.0                     | 6.83                      | $\text{C}_5/\text{H}_5$ in G-units                                           | sdGX, esGX              |
| Guaiacyl ( $\text{G}_6$ )              | 118.7                     | 6.76                      | $\text{C}_6/\text{H}_6$ in G-units                                           | sdGX, esGX, epGX        |
| p-hydroxyphenyl ( $\text{H}_{2,6}$ )   | <b>127.5</b>              | <b>7.21</b>               | $\text{C}_2/\text{H}_2$ and $\text{C}_6/\text{H}_6$ in H-units               | <b>esGX</b>             |
| $\beta$ -aryl ether ( $\beta$ -O-4)    | <b>71.4</b>               | <b>4.71</b>               | $\beta$ -O-4 signal in $\alpha$                                              | <b>sdGX, esGX, epGX</b> |
| $\beta$ -aryl ether ( $\beta$ -O-4)    | 85.5                      | 4.16                      | $\beta$ -O-4 signal in $\beta$ in S units                                    | sdGX, esGX, epGX        |
| $\beta$ -aryl ether ( $\beta$ -O-4)    | 59.5                      | 3.70/3.44                 | $\beta$ -O-4 signal in $\gamma$                                              | sdGX, esGX, epGX        |
| Phenylcoumaran ( $\beta$ -5)           | <b>87.2</b>               | <b>5.43</b>               | $\beta$ -5 signal in $\alpha$                                                | <b>sdGX, esGX, epGX</b> |
| Phenylcoumaran ( $\beta$ -5)           | 52.8                      | 3.46                      | $\beta$ -5 signal in $\beta$                                                 | sdGX, esGX, epGX        |
| Phenylcoumaran ( $\beta$ -5)           | 62.4                      | 3.72                      | $\beta$ -5 signal in $\gamma$                                                | sdGX, esGX, epGX        |
| Dibenzodioxocin (5-5/ $\beta$ -O-4)    | 82.9                      | 4.81                      | 5-5/ $\beta$ -O-4 signal in $\alpha$                                         | sdGX, esGX              |
| Dibenzodioxocin (5-5/ $\beta$ -O-4)    | <b>86.2</b>               | <b>3.91</b>               | 5-5/ $\beta$ -O-4 signal in $\beta$                                          | <b>esGX</b>             |
| Resinol ( $\beta$ - $\beta$ )          | <b>85.1</b>               | <b>4.61</b>               | $\beta$ - $\beta$ signal in $\alpha$                                         | <b>sdGX, esGX, epGX</b> |
| Resinol ( $\beta$ - $\beta$ )          | 53.6                      | 3.04                      | $\beta$ - $\beta$ signal in $\beta$                                          | sdGX, esGX, epGX        |
| Resinol ( $\beta$ - $\beta$ )          | 71.2                      | 4.14/3.83                 | $\beta$ - $\beta$ signal in $\gamma$                                         | sdGX, esGX, epGX        |
| SECO $_{\alpha}$ ( $\beta$ - $\beta$ ) | 33.6                      | 2.53/2.48                 | Secoisolariciresinol in $\alpha$                                             | -                       |
| SECO $_{\beta}$ ( $\beta$ - $\beta$ )  | <b>42.3</b>               | <b>1.84</b>               | Secoisolariciresinol in $\beta$                                              | -                       |
| Spirodienone ( $\beta$ -1)             | <b>81.2</b>               | <b>5.00</b>               | $\beta$ -1 signal in $\alpha$                                                | -                       |
| Spirodienone ( $\beta$ -1)             | 59.8                      | 2.75                      | $\beta$ -1 signal in $\beta$                                                 | -                       |
| Spirodienone ( $\beta$ -1)             | 79.4                      | 4.11                      | $\beta$ -1 signal in $\beta'$                                                | -                       |
| Methoxy group                          | <b>55.4</b>               | <b>3.73</b>               | C/H in -OMe in G- and S-units                                                | <b>sdGX, esGX, epGX</b> |
| Cinnamyl alcohol                       | 128.7                     | 6.42                      | Cinnamyl alcohol signal in $\alpha$                                          | esGX                    |
| Cinnamyl alcohol                       | 127.5                     | 6.21                      | Cinnamyl alcohol signal in $\beta$                                           | esGX                    |
| Cinnamyl alcohol                       | <b>62.8</b>               | <b>3.90</b>               | Cinnamyl alcohol signal in $\gamma$                                          | <b>sdGX, esGX, epGX</b> |
| OSC ( $\text{S}_{2,6}$ )               | <b>106.4</b>              | <b>7.20/7.06</b>          | $\text{C}_{2,6}/\text{H}_{2,6}$ in $(\text{C}=\text{O})_{\alpha}$ in S-units | <b>sdGX, esGX</b>       |
| OSC $_{\alpha}$                        | 154.0                     | 7.61                      | Cinnamyl aldehyde in $\alpha$                                                | sdGX, esGX              |
| OSC $_{\beta}$                         | 126.1                     | 6.77                      | Cinnamyl aldehyde in $\beta$                                                 | sdGX, esGX              |
| DCA $_{\alpha}$                        | 31.4                      | 2.52                      | Dehydroconiferyl alcohol in $\alpha$                                         | sdGX, esGX              |
| DCA $_{\beta}$                         | <b>34.4</b>               | <b>1.67</b>               | Dehydroconiferyl alcohol in $\beta$                                          | <b>sdGX, esGX</b>       |
| DCA $_{\gamma}$                        | 60.0                      | 3.42                      | Dehydroconiferyl alcohol in $\gamma$                                         | sdGX, esGX, epGX        |
| PG                                     | <b>104.5/99.8</b>         | <b>5.18/4.75</b>          | Phenylglycoside units                                                        | <b>sdGX, esGX, epGX</b> |
| BE ( $\text{BE}_1$ )                   | <b>80.2</b>               | <b>4.50</b>               | Benzylether in C-3 and C-2                                                   | -                       |
| BE ( $\text{BE}_2$ )                   | <b>82.3</b>               | <b>5.20</b>               | Benzylether in C-6 and C-5                                                   | <b>sdGX, esGX</b>       |
| BEst                                   | <b>74.3</b>               | <b>5.96</b>               | Benzyl ester ( $\alpha$ -ester)                                              | -                       |
| GE                                     | <b>64.0/62.0</b>          | <b>4.50/4.00</b>          | $\gamma$ -ester units                                                        | <b>sdGX, esGX, epGX</b> |

<sup>a</sup>Secoisolariciresinol (SECO  $\beta$ - $\beta$ ); Oxidized side chain (OSC); Dehydroconiferyl alcohol (DCA); PG: phenylglycoside; BE: benzylether, in which  $\text{BE}_1$  refers to linkage at C-6 in glucose, mannose, and galactose or C-5 in arabinose and  $\text{BE}_2$  refers to linkage at C-2 or C-3 in glucose, mannose, galactose, xylose, and arabinose; BEst: benzyl ester; and GE:  $\gamma$ -ester. Contours assignments were assessed according to the literature.<sup>9-15</sup>

## References

1. S. Gupta, R. N. AU - Madan and M. C. AU - Bansal, *Tappi journal (USA)*, 1987, **70**, 113-116.
2. M. Kačuráková, P. S. Belton, R. H. Wilson, J. Hirsch and A. Ebringerová, *Journal of the Science of Food and Agriculture*, 1998, **77**, 38-44.
3. O. Chaikumpollert, P. Methacanon and K. Suchiva, *Carbohydrate Polymers*, 2004, **57**, 191-196.
4. J. X. Sun, X. F. Sun, R. C. Sun and Y. Q. Su, *Carbohydrate Polymers*, 2004, **56**, 195-204.
5. A. Drobníak and M. Mastalerz, *International Journal of Coal Geology*, 2006, **66**, 157-178.
6. J. Bian, F. Peng, F. Xu, R.-C. Sun and J. F. Kennedy, *Carbohydrate Polymers*, 2010, **80**, 753-760.
7. F.-Z. Belmokaddem, C. Pinel, P. Huber, M. Petit-Conil and D. D. S. Perez, *Carbohydrate research*, 2011, **346**, 2896-2904.
8. M. A. Shamekhi, A. Rabiee, H. Mirzadeh, H. Mahdavi, D. Mohebbi-Kalhari and M. B. Eslaminejad, *Materials Science and Engineering: C*, 2017, **80**, 532-542.
9. C. S. Lancefield, Hans L. J. Wienk, R. Boelens, B. M. Weckhuysen and P. C. A. Bruijninx, *Chemical Science*, 2018, **9**, 6348-6360.
10. N. Giummarella and M. Lawoko, *ACS Sustainable Chemistry & Engineering*, 2017, **5**, 5156-5165.
11. M. Balakshin, E. Capanema, H. Gracz, H.-m. Chang and H. Jameel, *Planta*, 2011, **233**, 1097-1110.
12. X. Du, M. Pérez-Boada, C. Fernández, J. Rencoret, J. C. del Río, J. Jiménez-Barbero, J. Li, A. Gutiérrez and A. T. Martínez, *Planta*, 2014, **239**, 1079-1090.
13. H. Nishimura, A. Kamiya, T. Nagata, M. Katahira and T. Watanabe, *Scientific reports*, 2018, **8**, 1-11.
14. A. Martínez-Abad, N. Giummarella, M. Lawoko and F. Vilaplana, *Green chemistry*, 2018, **20**, 2534-2546.
15. N. Giummarella, M. Balakshin, S. Koutaniemi, A. Kärkönen and M. Lawoko, *Journal of Experimental Botany*, 2019, **70**, 5591-5601.
